# Supplementary material for: Identification of the lncRNA, AK156230, as a novel regulator of cellular senescence in mouse embryonic fibroblasts
Source: PubMed Central journal article supplement (PMC5288140; doi:10.18632/oncotarget.10170), 2016-06-19
Supplement: oncotarget-07-52673-s001.pdf [file oncotarget-07-52673-s001.pdf]

# Identification of the lncRNA, AK156230, as a novel regulator of cellular senescence in mouse embryonic fibroblasts

Supplementary Material

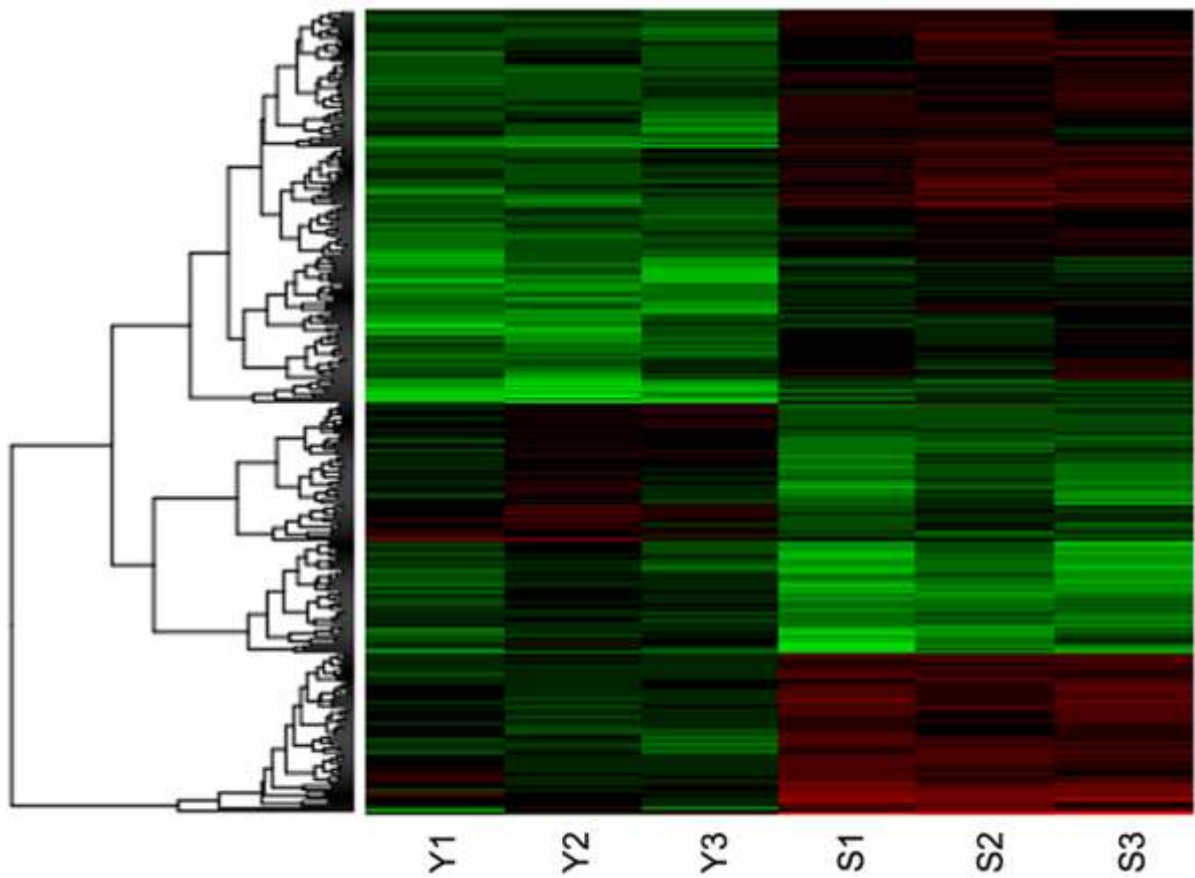

Supplementary Figure S1: mRNA expression profiles in senescent and young MEFs

(A)

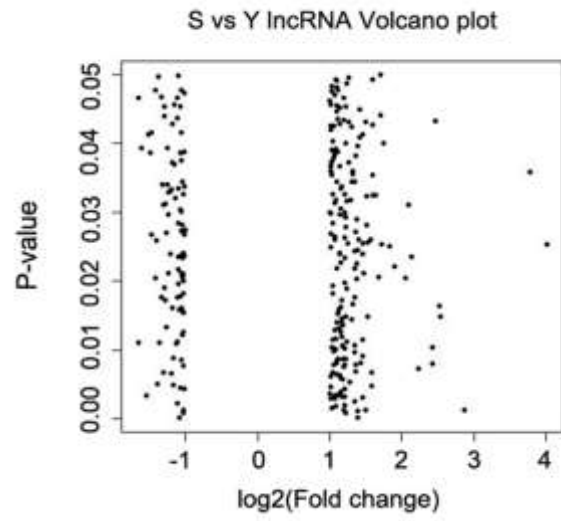

(B)

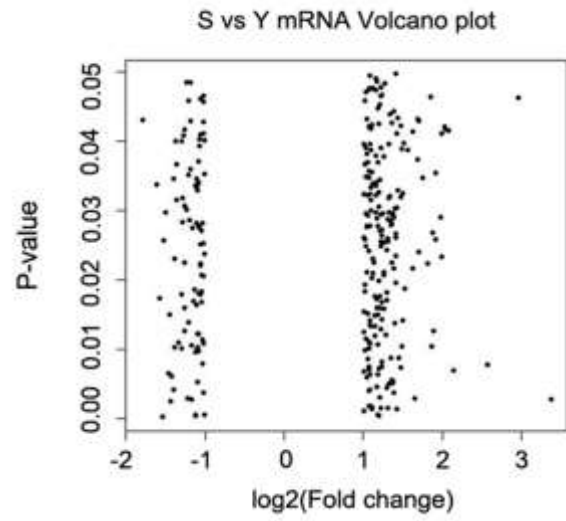

**Supplementary Figure S2: Volcano plot of differentially expressed lncRNAs and mRNAs in senescent and young MEFs.**

(A)

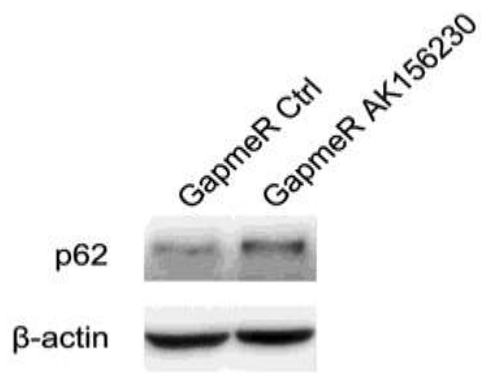

(B)

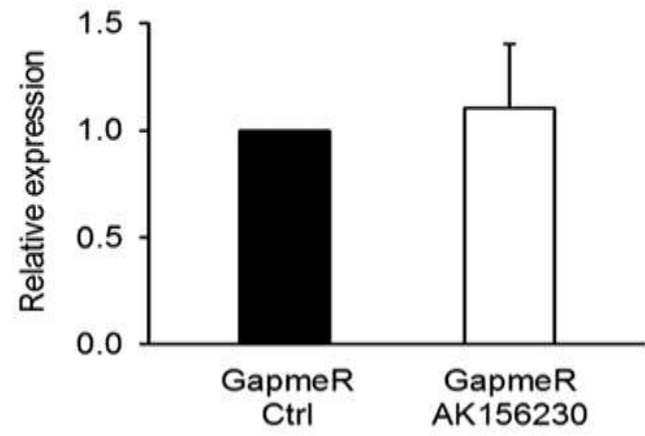

**Figure S3: p62 expression after silencing of AK156230 in MEFs.**

**Table S6: Numbers of expressed differentially lncRNAs and mRNAs in senescent and young MEFs**

|                 | <b>Fold change<br/>2-3</b> | <b>Fold change<br/>3-4</b> | <b>Fold change<br/>&gt;4</b> | <b>total</b> |
|-----------------|----------------------------|----------------------------|------------------------------|--------------|
| <b>lncRNA</b>   |                            |                            |                              |              |
| Up-regulation   | 168                        | 12                         | 12                           | 192          |
| Down-regulation | 94                         | 3                          | 0                            | 97           |
| <b>mRNA</b>     |                            |                            |                              |              |
| Up-regulation   | 182                        | 18                         | 7                            | 207          |
| Down-regulation | 92                         | 2                          | 0                            | 94           |

**Table S7: Primers used for RT-qPCR analysis to validate lncRNAs expression**

| <b>Primer</b>  | <b>Sequence (sense)</b>     | <b>Sequence (antisense)</b> |
|----------------|-----------------------------|-----------------------------|
| AK137091       | GGGTCGTTGGTTGGTTTC          | TCATTAGGCGATTGGTTCA<br>C    |
| AK029004       | TTGGGTACTTCCTCTGTGCCT       | CAACGAAGCTAAGAGCTG<br>GC    |
| AK048098       | TTCTCTGATGACTGCCGAGC        | GGAACCCATACCCAACCCT         |
| AK042519       | CCTTAGGGCTGCCTGATTC         | TTGGTTATAGCTGGTATGG<br>TGC  |
| AK041802       | ACGGCATCGCATCGTATGT         | TCCAGCATCCTCAGGGTCT<br>G    |
| AK085841       | CAAGGTCCGTGGTTTGTC          | CACTTACCCATTTCTTCTGT<br>TCC |
| AK135413       | GCCCACTGACACCTCCTATT        | ATCAGACCCTTTCTCCAGT<br>TG   |
| AK156230       | GAGGCTTTGAAAGTATGCTG<br>C   | AAGTGGGGTGTTGAATTGG<br>T    |
| $\beta$ -actin | AGATGACCCAGATCATGTTT<br>GAG | AGAGCATAGCCCTCGTAGA<br>T    |

**Table S8: Sequences for LNA longRNA GapmeR**

| <b>LNA GapmeR</b> | <b>Sequence</b>      |
|-------------------|----------------------|
| GapmeR AK156230   | GGAATAAAGATGGAC<br>T |
| GapmeR AK135413   | AACTAACAGTAATGG<br>A |
| GapmeR AK048098   | TTTAGCATGCTTGGTT     |
| GapmeR Ctrl       | AACACGTCTATACGC      |

**Table S9: Numbers of differentially expressed mRNAs for AK156230 knockdown**

| <b>mRNA</b>     | <b>Fold change<br/>2-4</b> | <b>Fold change<br/>4-8</b> | <b>Fold change<br/>&gt;8</b> | <b>total</b> |
|-----------------|----------------------------|----------------------------|------------------------------|--------------|
| Up-regulation   | 412                        | 45                         | 19                           | 476          |
| Down-regulation | 900                        | 197                        | 60                           | 1157         |

**Table S10: GO term (Biological process) for the differentially expressed transcripts after AK156230 knockdown**

| <b>GO.ID</b> | <b>Term</b>                                           | <b>Count</b> | <b>p-Value</b> | <b>q-Value</b> |
|--------------|-------------------------------------------------------|--------------|----------------|----------------|
| GO:0007050   | cell cycle arrest                                     | 16           | 4.493E-10      | 3.019E-08      |
| GO:0008285   | negative regulation of cell proliferation             | 31           | 6.512E-10      | 4.213E-08      |
| GO:0016242   | negative regulation of macroautophagy                 | 6            | 1.204E-09      | 6.789E-08      |
| GO:0000046   | autophagic vacuole fusion                             | 4            | 3.145E-07      | 9.082E-06      |
| GO:0045786   | negative regulation of progression through cell cycle | 11           | 0.000151       | 0.001576       |
| GO:0001302   | replicative cell aging                                | 2            | 0.010895       | 0.040715       |
| GO:0048147   | negative regulation of fibroblast proliferation       | 2            | 0.014300       | 0.050116       |
| GO:0030308   | negative regulation of cell growth                    | 5            | 0.015794       | 0.054104       |
| GO:0000086   | G2/M transition of mitotic cell cycle                 | 2            | 0.022272       | 0.063341       |
| GO:0006914   | autophagy                                             | 3            | 0.072929       | 0.131688       |

**Table S11: KEGG pathway terms for the differentially expressed transcripts after AK156230 knockdown**

| <b>KEGG Pathway</b>                    | <b>Count</b> | <b><i>p</i>-Value</b> | <b><i>q</i>-Value</b> |
|----------------------------------------|--------------|-----------------------|-----------------------|
| p53 signaling pathway                  | 7            | 1.43906E-06           | 5.58286E-06           |
| Cell cycle                             | 6            | 0.000366409           | 0.000746731           |
| mTOR signaling pathway                 | 5            | 4.7086E-05            | 0.000135372           |
| Regulation of autophagy                | 2            | 0.028836139           | 0.029016365           |
| Focal adhesion                         | 27           | 6.5182E-26            | 1.04943E-23           |
| Axon guidance                          | 23           | 9.31464E-25           | 7.49828E-23           |
| ECM-receptor interaction               | 19           | 3.433E-23             | 1.84238E-21           |
| Cytokine-cytokine receptor interaction | 26           | 9.76253E-22           | 3.92942E-20           |
| Biosynthesis of steroids               | 11           | 5.16602E-18           | 1.66346E-16           |
| Starch and sucrose metabolism          | 12           | 4.78614E-17           | 1.28428E-15           |



**Table S12: Primers used for RT-qPCR analysis to validate mRNAs expression**

| <b>Primer</b>  | <b>Sequence (sense)</b>     | <b>Sequence (antisense)</b> |
|----------------|-----------------------------|-----------------------------|
| ULK2           | TGGGAATGACCCTCGTGAG         | AGCTACATCCATTGGTCGT<br>TCT  |
| ATG7           | CGCCAAGATCTCCTACTCCA<br>AT  | GGCATTCACTCCGGGAAAT<br>A    |
| ATG16L2        | CGAATCAGCAATATCCGACA<br>G   | CACCAAGCCACGGCATT           |
| CDKN1A         | AGGCACCATGTCCAATCC          | AAGTCAAAGTTCCACCGTT<br>CT   |
| Rprm           | GGTCAACAGTAGCGAGGCG         | CAGCCAAGGAAGAAGATG<br>CC    |
| Inhba          | CCAAAGTCACCATCCGTCTA        | GGTACTCTTCCGAGCATCA<br>AC   |
| Cgref1         | GGACCCTGAGGTACAACAGC        | GTCATGAAGAGCAAAGAG<br>CG    |
| P62            | TCTCTACAGATGCCAGAATC<br>G   | CTGTAGGAGCCTGGTGAGC         |
| $\beta$ -actin | AGATGACCCAGATCATGTTT<br>GAG | AGAGCATAGCCCTCGTAGA<br>T    |
